# Supplementary material
Source: PubMed Central journal article supplement (PMC3486555)
Supplement: AAC.01406-12_zac999101356so2.pdf [file AAC.01406-12_zac999101356so2.pdf]

## Supplementary Figure 1. Levels of soluble biomarkers at baseline and after eight –day therapy.

(A)

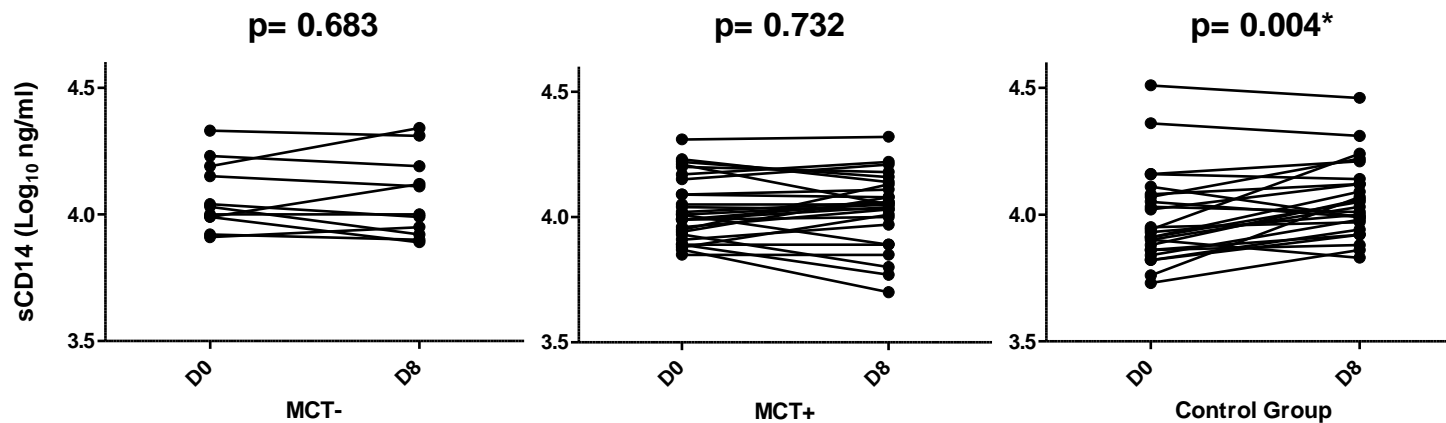

(B)

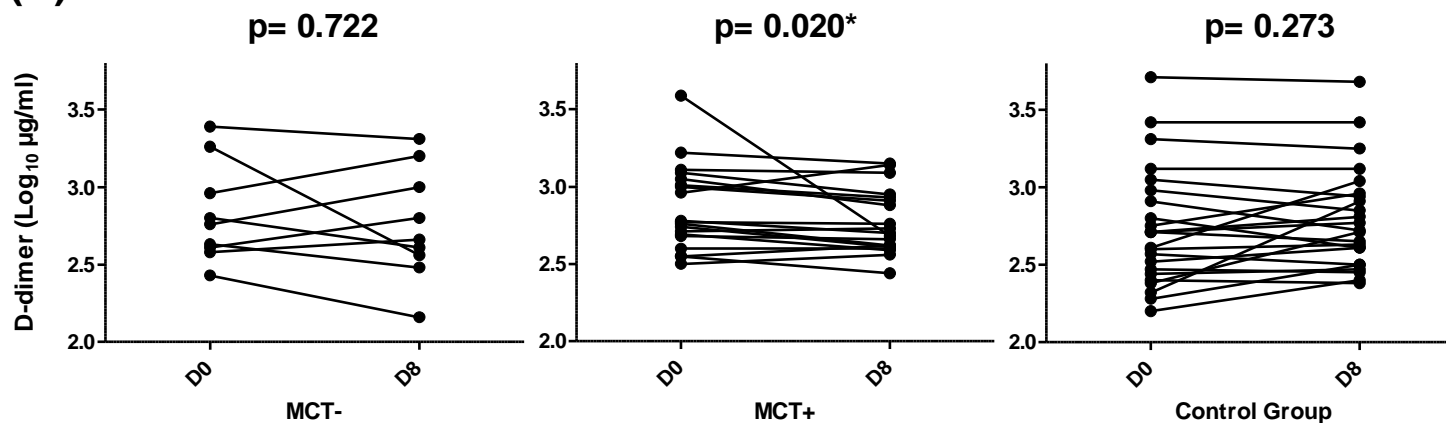

### Figure legends

Fig. S1. The results are expressed as sCD14 (A) and D-dimer (B) levels at day 0 and day 8, for every study group. Every black line represents a patient on follow up. Differences along the follow-up were studied using the Wilcoxon test; significant values are depicted with an asterisk.

**Supplementary Table 1. Baseline characteristics of the patients with follow-up at week 12.**

| Characteristics                                  | MCT- (n=11) <sup>a</sup> | MCT+ (n=24) <sup>b</sup> | Control Group (n=13) <sup>c</sup> | <i>p</i> (a vs c) <sup>*</sup> | <i>p</i> (b vs c) <sup>**</sup> |
|--------------------------------------------------|--------------------------|--------------------------|-----------------------------------|--------------------------------|---------------------------------|
| Age (years)                                      | 43 [38 — 45]             | 44 [41 — 48]             | 33 [28 — 47]                      | ns                             | 0.048                           |
| Male sex, n (%)                                  | 9 (81.8)                 | 16 (66.7)                | 10 (76.9)                         | ns                             | ns                              |
| Time from HIV-diagnosis (weeks)                  | 858 [658 — 1014]         | 950 [616 — 1061]         | 10 [6 — 41]                       | <0.001                         | <0.001                          |
| CDC clinical stage C, n (%)                      | 4 (36.4)                 | 3(12.5)                  | 2 (15.4)                          | ns                             | ns                              |
| CD4+ T-cells (cells/mm <sup>3</sup> )            | 41 [17 — 162]            | 332 [234 — 487]          | 167 [62 — 348]                    | 0.056                          | 0.016                           |
| Nadir CD4+ T-cells (cells/mm <sup>3</sup> )      | 33 [4 — 84]              | 217 [145 — 302]          | 121 [55 — 348]                    | 0.005                          | ns                              |
| CD8+ T-cells (cells/mm <sup>3</sup> )            | 424 [372 — 1479]         | 826 [609 — 982]          | 677 [546 — 968]                   | ns                             | ns                              |
| HIV-Viral Load (Log <sub>10</sub> RNA-copies/ml) | 4.9 [4.3 — 5.3]          | 4.1 [2.9 — 4.8]          | 5.2 [4.8 — 5.3]                   | ns                             | 0.001                           |
| HCV PCR <sup>+,1</sup> n (%)                     | 5 (45.5)                 | 9 (37.5)                 | 0 (0)                             | 0.014                          | 0.016                           |

Data are expressed as the median [interquartile range] of all participants unless otherwise specified.

<sup>1</sup>PCR<sup>+</sup>, PCR positive for hepatitis C virus. Chi-square and Mann-Whitney U tests were used for categorical and continuous variables respectively.

\* Differences between MCT- and control group. \*\* Differences between MCT+ and control group. **ns**: no significant.

**Supplementary Table 2. Background regimen of 12 weeks cART.**

| <b>Background regimen</b>    | <b>MCT- (n=11)</b> | <b>MCT+ (n=24)</b> | <b>Control Group (n=13)</b> |
|------------------------------|--------------------|--------------------|-----------------------------|
| Two nucleoside analogs n (%) | 9 (81.8)           | 11 (45.8)          | 13 (100)                    |
| No nucleoside analogs n (%)  | 2 (18.2)           | 13 (54.2)          | 0                           |

## Supplementary Figure 2. Levels of soluble biomarkers baseline and after 12 weeks.

(A)

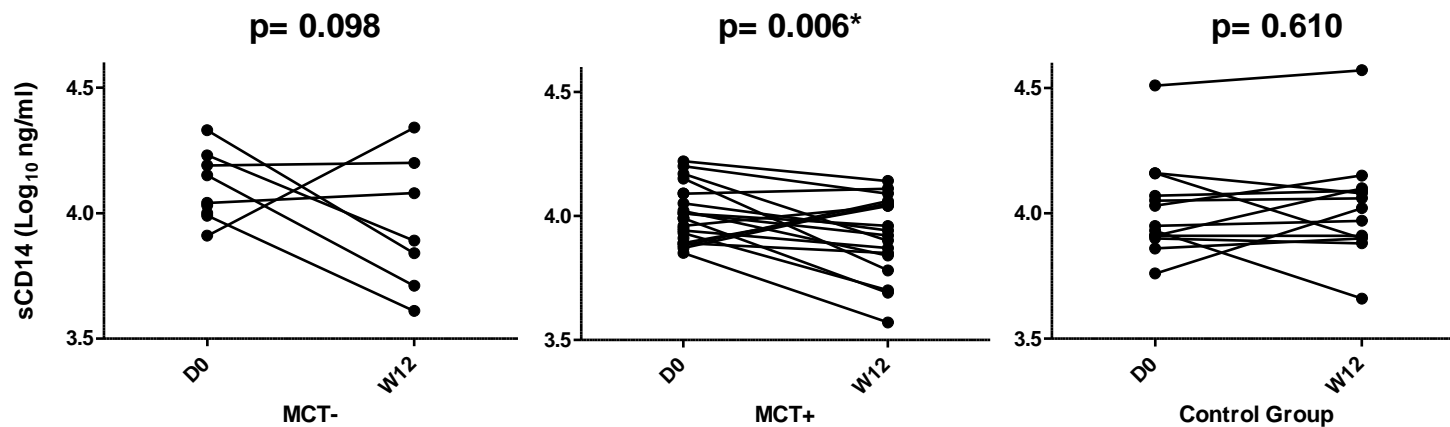

(B)

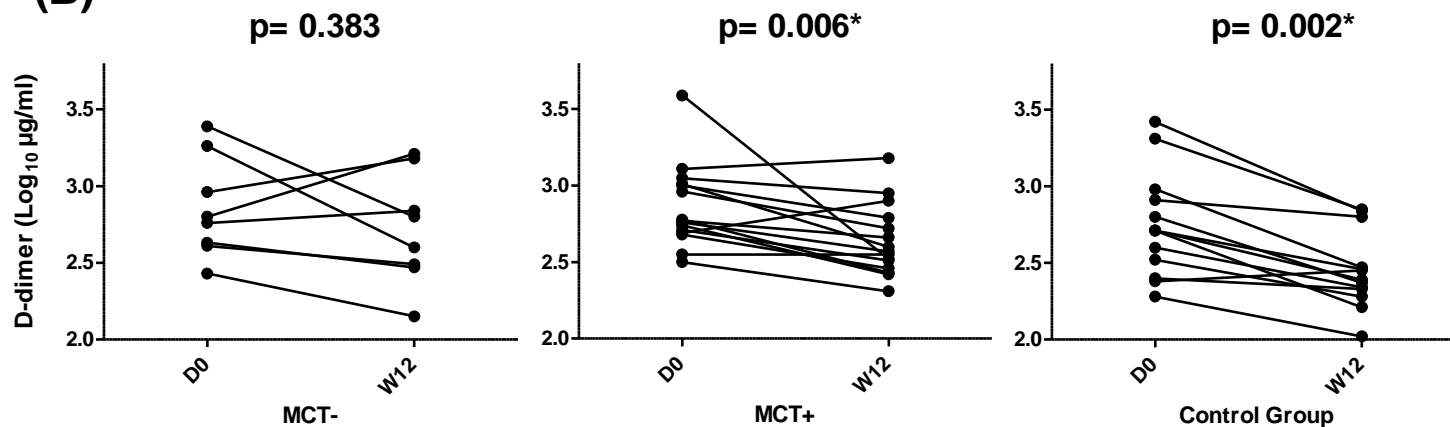

### Figure legends

Fig. S2. The results are expressed as sCD14 (A) and D-dimer (B) levels at day 0 and week 12, for every study group. Every black line represents a patient on follow up. Differences along the follow-up were studied using the Wilcoxon test; significant values are depicted with an asterisk.
